# Supplementary material for: Comprehensive comparison of transcriptomes in SARS-CoV-2 infection: alternative entry routes and innate immune responses
Source: bioRxiv or medRxiv preprint supplement (doi:10.1101/2021.01.07.425716), 2021-01-11
Supplement: Supplementary file [file media-1.pdf]

# Supplementary

Yingying Cao<sup>1\*</sup>, Xintian Xu<sup>2</sup>, Simo Kitanovski<sup>1</sup>, Lina Song<sup>3</sup>, Jun Wang<sup>1</sup>,  
Pei Hao<sup>2,4\*</sup>, Daniel Hoffmann<sup>1\*</sup>

<sup>1</sup>Bioinformatics and Computational Biophysics,  
Faculty of Biology and Center for Medical Biotechnology,  
University of Duisburg-Essen, Essen 45141, Germany

<sup>2</sup>Key Laboratory of Molecular Virology and Immunology,  
Institut Pasteur of Shanghai, Center for Biosafety Mega-Science,  
Chinese Academy of Sciences, Shanghai 200031, China

<sup>3</sup>Translational Skin Cancer Research,  
German Consortium for Translational Cancer Research, Essen, Germany

<sup>4</sup>The Joint Program in Infection and Immunity:  
a. Guangzhou Women and Children's Medical Center,  
Guangzhou Medical University, Guangzhou 510623, China;  
b. Institut Pasteur of Shanghai,  
Chinese Academy of Sciences, Shanghai 200031, China

\*To whom correspondence should be addressed;  
E-mail: daniel.hoffmann@uni-due.de, phao@ips.ac.cn, yingying.cao@uni-due.de.

## 1 Additional information about public data

All data can be downloaded from public repositories, the three main sources are NCBI (1) (<https://www.ncbi.nlm.nih.gov/>) and ENA (2) (<https://www.ebi.ac.uk/ena/>) and BIG Data Center (3) (<https://bigd.big.ac.cn/>).

### 1.1 GSE147507 dataset (4)

From this dataset we downloaded: Biological triplicates of primary human lung epithelium (NHBE) which were mock treated or infected with SARS-CoV-2 (USA-WA1/2020) at an MOI

of 2; Biological triplicates of transformed lung alveolar (A549) cells which were mock treated or infected with SARS-CoV-2 (USA-WA1/2020) at an MOI of 0.2 or 2; Biological triplicates of transformed lung alveolar (A549) transduced with a vector expressing human ACE2, which were also mock treated or infected with SARS-CoV-2 (USA-WA1/2020) at an MOI of 0.2 or 2; Biological triplicates of transformed lung-derived Calu-3 cells which were mock treated or infected with SARS-CoV-2 (USA-WA1/2020) at an MOI of 2; COVID-19 patient samples: Uninfected human lung biopsies derived from one male (age 72) and one female (age 60) and used as control biological replicates, and lung samples derived from a single male COVID-19 deceased patient (age 74) which were processed in technical replicates. Library preparation method polyA+ selection was used to remove rRNAs before sequencing.

## **1.2 GSE148729 dataset (5)**

From this dataset we downloaded biological replicates of Calu-3, Caco-2 and H1299 cells which were mock treated or infected with SARS-CoV-2 (patient isolate BetaCoV/Munich/BavPat1/2020/EPI\_ISL\_406862) or SARS-CoV (Frankfurt strain) at an MOI of 0.3. Library preparation method polyA+ selection was used to remove rRNAs before sequencing Caco-2 and H1299 cells. For Calu-3 cells, two library preparation method polyA+ selection and rRNA-depletion were used respectively to remove rRNAs before sequencing.

## **1.3 GSE153940 dataset**

From this dataset we downloaded RNA sequencing data of Vero E6 cells which were either mock-infected or infected with SARS-CoV-2 USA-WA1/2020 (MOI = 0.3) with three replicates. However, when we downloaded the data one sample with accession number GSM4658806 was not available for downloading. Cells were harvested at 24 hours after infection, and rRNA-depletion method was used to extract RNA for sequencing.

## **1.4 GSE56189 dataset**

From this dataset we downloaded: Biological triplicates of MRC5 and Vero E6 cells which were mock treated or infected with SARS-CoV (Urbani strain) or MERS-CoV (EMC/2012) at an MOI of 0.1 or 3. Library preparation method polyA+ selection was used to remove rRNAs before sequencing.

## **1.5 CRA002390 dataset (6)**

This dataset is public available in <https://bigd.big.ac.cn/gsa/browse/CRA002390>. From this dataset we downloaded: The raw FASTQ data of PBMC and BALF samples of COVID-19 patients and corresponding PBMC controls.

## **1.6 PRJNA434133 dataset (7)**

From this dataset we downloaded the raw FASTQ data for BALF healthy control samples with accession numbers SRR10571724, SRR10571730, and SRR10571732.

## **1.7 GSE145926 dataset (8)**

From this dataset we downloaded the preprocessed single cell RNA-Seq data of BALF samples from 6 severe COVID-19 patients and 3 mild COVID-19 patients.

## **1.8 PRJNA526088 dataset (9)**

From this dataset we downloaded the preprocessed single cell RNA-Seq data of BALF sample from a healthy control with accession number GSM3660650.

## 2 Supplementary figures

Fig. S1:

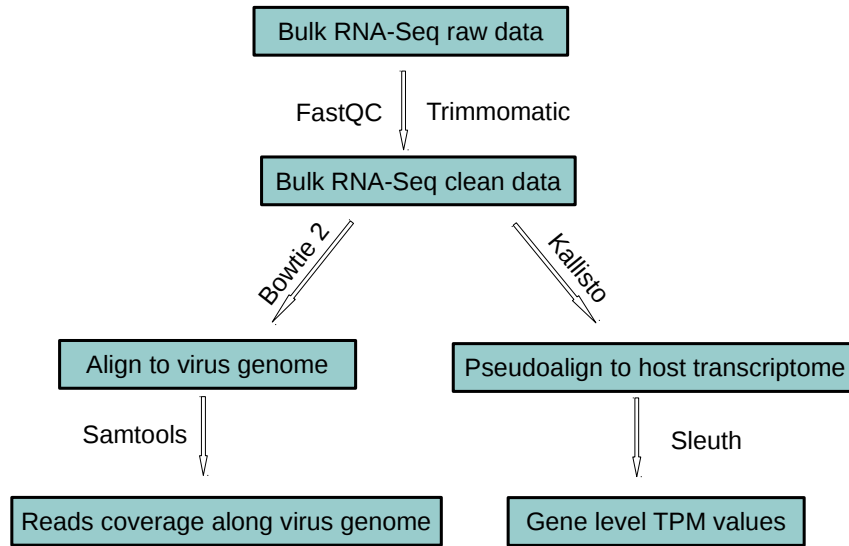

Fig. S2:

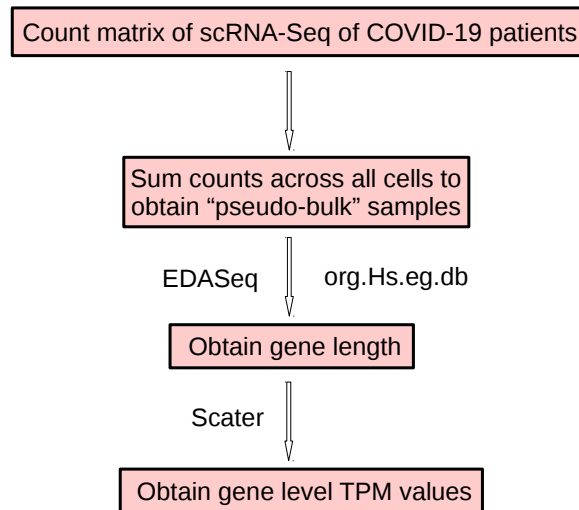

**Fig. S3:**

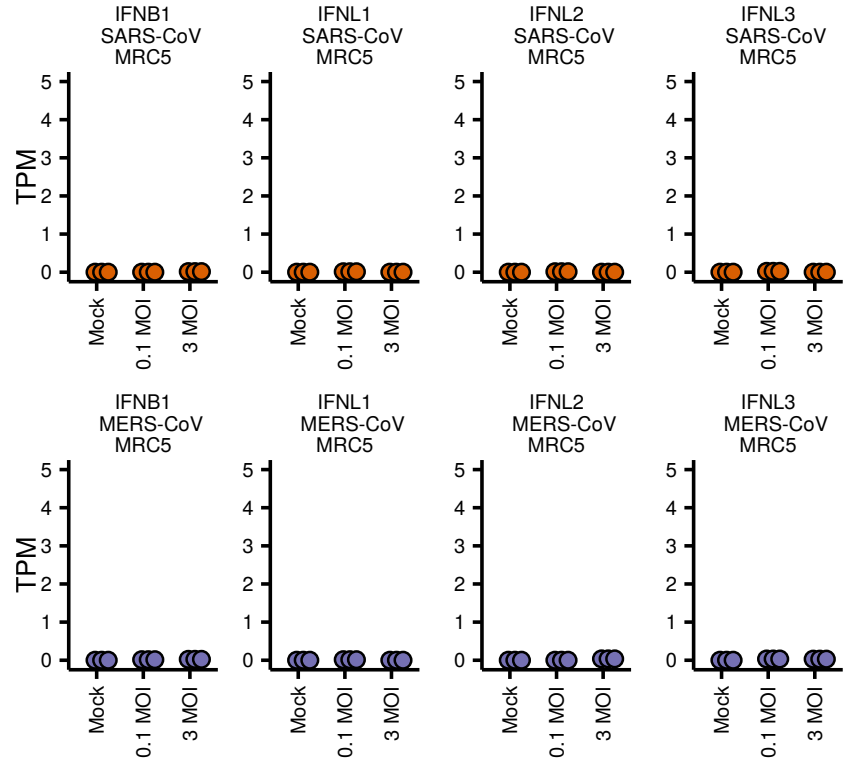

**Fig. S4:**

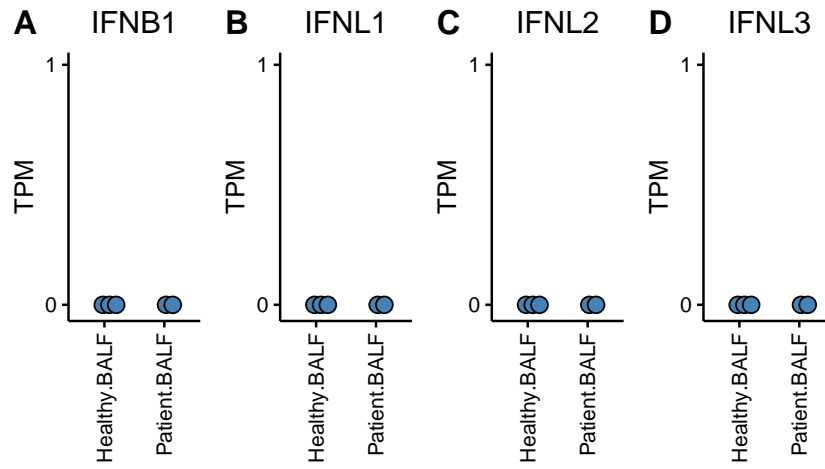

**Fig. S5:**

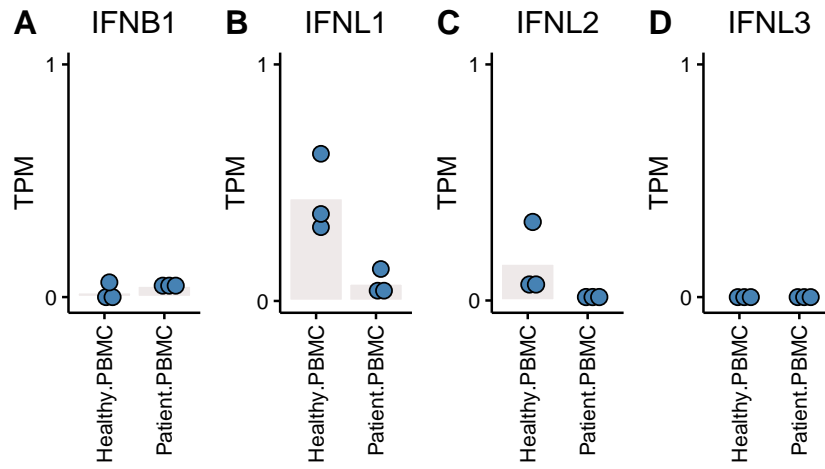

**Fig. S6:**

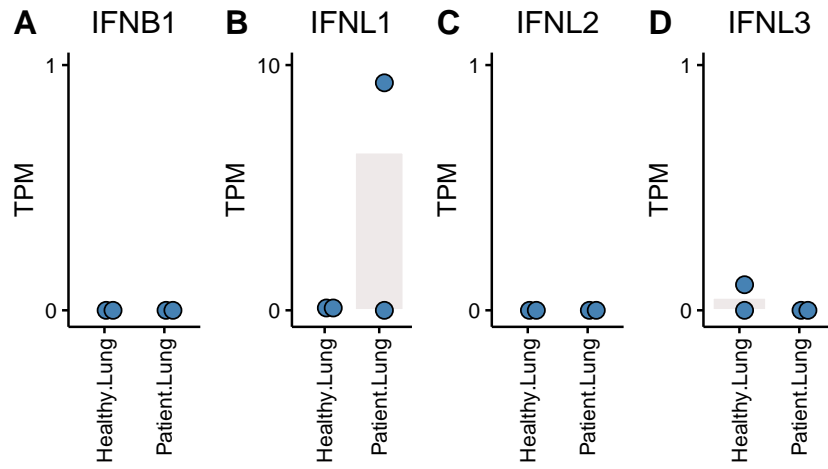



**Fig. S7:**

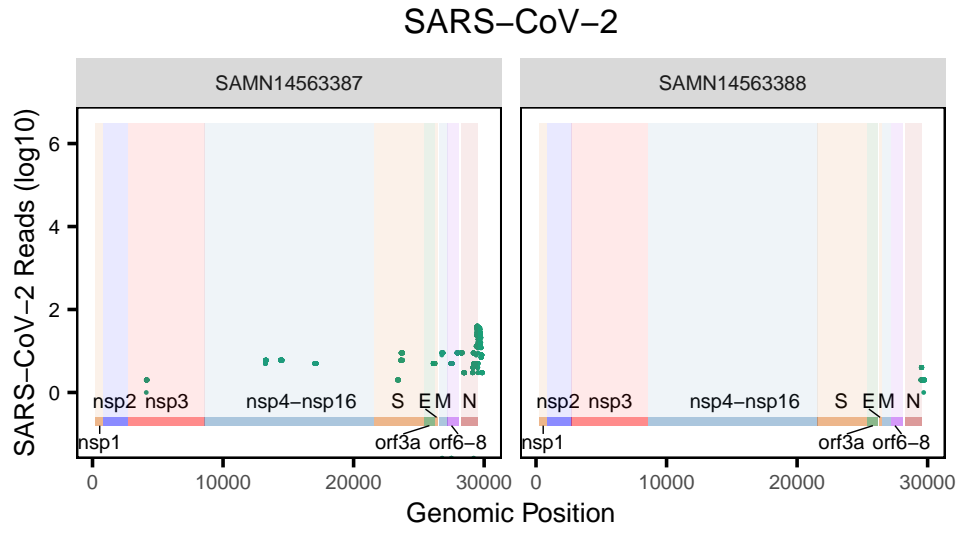

**Fig. S8:**

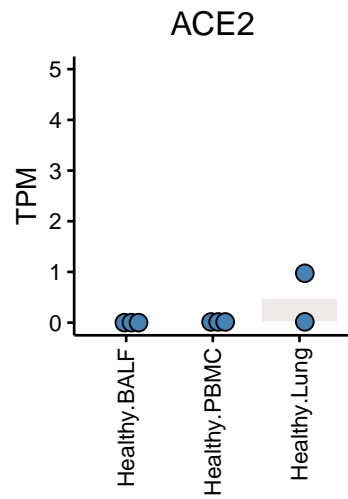

## References

1. D. L. Wheeler, T. Barrett, D. A. Benson, S. H. Bryant, K. Canese, V. Chetvernin, D. M. Church, M. DiCuccio, R. Edgar, S. Federhen, *et al.*, Database resources of the national center for biotechnology information. *Nucleic acids research* **36**, D13–D21 (2007).
2. R. Leinonen, R. Akhtar, E. Birney, L. Bower, A. Cerdeno-Tárraga, Y. Cheng, I. Cleland, N. Faruque, N. Goodgame, R. Gibson, *et al.*, The european nucleotide archive. *Nucleic acids research* **39**, D28–D31 (2010).
3. N. G. D. C. Members, *et al.*, Database resources of the national genomics data center in 2020. *Nucleic Acids Research* **48**, D24 (2020).
4. D. Blanco-Melo, B. E. Nilsson-Payant, W.-C. Liu, S. Uhl, D. Hoagland, R. Møller, T. X. Jordan, K. Oishi, M. Panis, D. Sachs, *et al.*, Imbalanced host response to sars-cov-2 drives development of covid-19. *Cell* (2020).
5. E. Wyler, K. Mösbauer, V. Franke, A. Diag, L. T. Gottula, R. Arsie, F. Klironomos, D. Koppstein, S. Ayoub, C. Buccitelli, *et al.*, Bulk and single-cell gene expression profiling of sars-cov-2 infected human cell lines identifies molecular targets for therapeutic intervention. *bioRxiv* (2020).
6. Y. Xiong, Y. Liu, L. Cao, D. Wang, M. Guo, A. Jiang, D. Guo, W. Hu, J. Yang, Z. Tang, *et al.*, Transcriptomic characteristics of bronchoalveolar lavage fluid and peripheral blood mononuclear cells in covid-19 patients. *Emerging microbes & infections* **9**, 761–770 (2020).
7. D. Michalovich, N. Rodriguez-Perez, S. Smolinska, M. Pirozynski, D. Mayhew, S. Uddin, S. Van Horn, M. Sokolowska, C. Altunbulakli, A. Eljaszewicz, *et al.*, Obesity and disease severity magnify disturbed microbiome-immune interactions in asthma patients. *Nature communications* **10**, 1–14 (2019).
8. M. Liao, Y. Liu, J. Yuan, Y. Wen, G. Xu, J. Zhao, L. Cheng, J. Li, X. Wang, F. Wang, *et al.*, Single-cell landscape of bronchoalveolar immune cells in patients with covid-19. *Nature medicine* pp. 1–3 (2020).
9. C. Morse, T. Tabib, J. Sembrat, K. L. Buschur, H. T. Bittar, E. Valenzi, Y. Jiang, D. J. Kass, K. Gibson, W. Chen, *et al.*, Proliferating spp1/mertk-expressing macrophages in idiopathic pulmonary fibrosis. *European Respiratory Journal* **54** (2019).
